# Supplementary material for: Improving thermoelectric performance by constructing a SnTe/ZnO core–shell structure
Source: Royal Society of Chemistry journal article supplement (doi:10.1039/d2ra04255j), 2022-01-01
Supplement: d2ra04255j1.pdf [file d2ra04255j1.pdf]

## Supporting Information

### **Improving thermoelectric performance by constructing SnTe/ZnO core-shell structure**

Song Li<sup>a</sup>, Jing-Wen Zhang<sup>\*a,b</sup>, Da-Wei Liu<sup>a</sup>, Yan Wang,<sup>a</sup> and Jiu-Xing Zhang<sup>\*a</sup>

---

<sup>a</sup>School of Materials Science and Engineering, Hefei University of Technology, Hefei, 230009, China.

<sup>b</sup>School of Physics and Materials Engineering, Hefei Normal University, Hefei 230009, China

\*Corresponding E-mail: [zjwhfut18205614071@163.com](mailto:zjwhfut18205614071@163.com)

\*Corresponding E-mail: [zjiuxing@hfut.edu.cn](mailto:zjiuxing@hfut.edu.cn)

## Section 1:

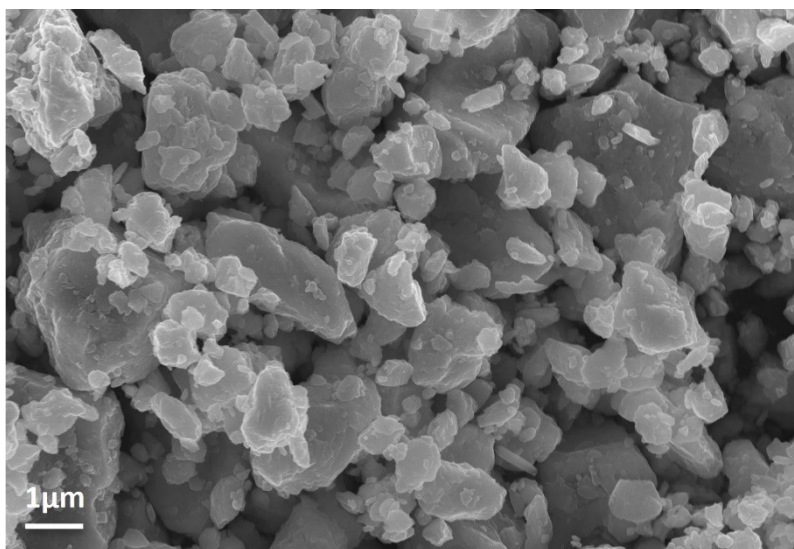

Fig. S1 the pristine SnTe particles prepared by conventional melting and hand grinding.

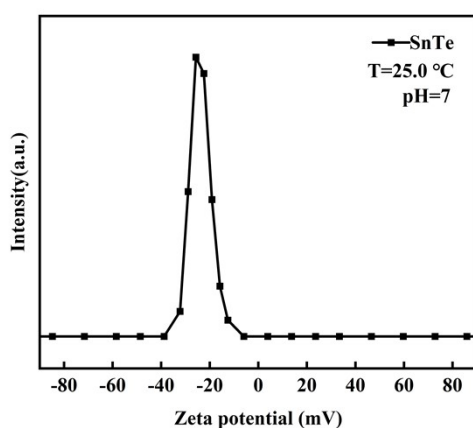

Fig. S2 Zeta potential of SnTe particles dispersed in aqueous solution.

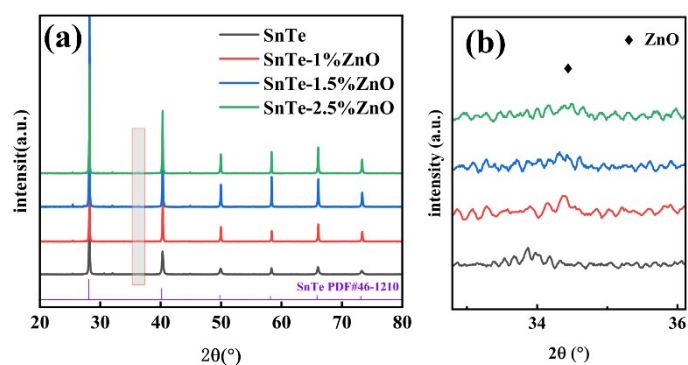

Fig. S3 (a)XRD patterns of SnTe-x%ZnO (x=0, 1, 1.5, 2.5) bulks. (b)2θ shifts for SnTe-x%ZnO (x=0, 1, 1.5, 2.5) bulks.
